# Supplementary material for: Surface modification strategy based on molecular engineering of an organic cation toward spectrally stable deep-blue emission perovskites
Source: Royal Society of Chemistry journal article supplement (doi:10.1039/d1tc05313b), 2021-12-28
Supplement: d1tc05313b1.pdf [file d1tc05313b1.pdf]

## Supporting Information

Surface modification strategy based on molecular engineering of organic cation toward spectrally stable deep-blue emission perovskites

Yifei Yue<sup>a</sup>, Shengnan Liu<sup>a</sup>, Baohua Zhang<sup>\*b</sup>, Zhongmin Su<sup>a</sup>, Dongxia Zhu<sup>\*a</sup>

<sup>a</sup> Key Laboratory of Nanobiosensing and Nanobioanalysis at Universities of Jilin Province, Department of Chemistry, Northeast Normal University, 5268 Renmin Street, Changchun, Jilin Province 130024, P. R. China.

<sup>b</sup> Centre for Advanced Analytical Science, c/o School of Chemistry and Chemical Engineering, Guangzhou University, Guangzhou Key Laboratory of Sensing Materials & Devices, Guangzhou 510006, P.R.China.

### Experimental Methods

#### Materials.

Cesium carbonate ( $\text{Cs}_2\text{CO}_3$ , 99.0%), oleic acid (OA, 90.0%), oleylamine (OLA, 90.0%), 4,4'-diaminobiphenyl (99.0%), 3,3',4,4'-biphenyltetramine (99.0%), hydrochloric acid ( $\text{H}_2\text{O}$ , 36%), lead bromide ( $\text{PbBr}_2$ , 99.0%), lead chloride ( $\text{PbCl}_2$ , 99.0%), 1-octadecene (ODE, 90.0%), ethyl acetate (EA, 99.5%), ethanol (EtOH, 99.5%), petroleum ether (PET, 99.5%). All chemicals were directly used without further purification.

#### Synthesis of Cs-oleate solution.

$\text{Cs}_2\text{CO}_3$  (0.8 g), OA (2.5 mL) and ODE (30.0 mL) were loaded into a 100 mL round bottom flask and heated under  $\text{N}_2$  at 130 °C for 1 h. The mixture was then heated to 150 °C for 30 min until  $\text{Cs}_2\text{CO}_3$  powder totally dissolved. The solution was cooled down to room temperature and stored in the desiccator.

#### Synthesis of 4,4'-diaminobiphenyl hydrochloride (named as 2N).

4,4'-diaminobiphenyl (3 mmol) and EtOH (50 mL) were loaded into a 100 mL single-neck round bottom flask and stirred in the ice water bath for 20 min. 1 mL of hydrochloric acid was added to the flask every 20 min, repeat 3 times and continue stirring for 8 h. The obtained product was subjected to rotary evaporation to remove the solvent and then ultrasonically cleaned with an EtOH/PET mixed solvent for 3 times, and the obtained product was placed in a vacuum oven and heated to 50 °C to dry overnight.

#### Synthesis of 3,3',4,4'-biphenyltetramine hydrochloride (named as 4N).

3,3',4,4'-biphenyltetramine (3 mmol) and EtOH (50 mL) were loaded into a 100 mL single-neck round bottom flask and stirred in the ice water bath for 20 min. 2 mL of hydrochloric acid was added to the flask every 20 min, repeat 3 times and continue stirring for 8 h. The obtained product was subjected to rotary evaporation to remove the solvent and then ultrasonically cleaned with an EtOH/PET mixed solvent for 3 times, and the obtained product was placed in a vacuum oven and heated to 50 °C to dry overnight.

#### Synthesis of $\text{CsPbBr}_{3-x}\text{Cl}_x$ .

$\text{PbX}_2$  (0.72 mmol), OLA (2 mL), OA (2 mL), 2N (or 4N) and ODE (20.0 mL) were loaded into a

50 mL 2-neck round bottom flask and heated under N<sub>2</sub> at 100 °C for 40 min until PbBr<sub>2</sub> powder totally dissolved (Table S1-S3). Then Cs-oleate solution preheated to 80 °C (2 mL) was injected quickly into the solution. The mixture was kept at 100 °C for 20 min. Then the mixture was cooled down to room temperature quickly by ice-water bath. EA was added to the mixture to 200 mL and stirred for 20 min. The product was obtained by centrifuging and purified by moderate EA and then dried at 50 °C in a vacuum oven.

Table S1 The dosage of PbX<sub>2</sub>.

|                        | PbBr <sub>2</sub>    | PbCl <sub>2</sub>    |
|------------------------|----------------------|----------------------|
| CsPbBrCl <sub>2</sub>  | 0.0881 g (0.24 mmol) | 0.1335 g (0.48 mmol) |
| CsPbBr <sub>2</sub> Cl | 0.1762 g (0.48 mmol) | 0.0667 g (0.24 mmol) |

Table S2 The dosage of ligands (CsPbBr<sub>3-x</sub>Cl<sub>x</sub>-2N).

|                                                     | 2N       | OA     | OLA    |
|-----------------------------------------------------|----------|--------|--------|
| CsPbBr <sub>3-x</sub> Cl <sub>x</sub> -0            | 0        | 2.0 mL | 2.0 mL |
| CsPbBr <sub>3-x</sub> Cl <sub>x</sub> -2N 0.06 mmol | 0.0154 g | 2.0 mL | 2.0 mL |
| CsPbBr <sub>3-x</sub> Cl <sub>x</sub> -2N 0.12 mmol | 0.0309 g | 2.0 mL | 2.0 mL |
| CsPbBr <sub>3-x</sub> Cl <sub>x</sub> -2N 0.18 mmol | 0.0463 g | 2.0 mL | 2.0 mL |

Table S3 The dosage of ligands (CsPbBr<sub>3-x</sub>Cl<sub>x</sub>-4N).

|                                                     | 4N       | OA     | OLA    |
|-----------------------------------------------------|----------|--------|--------|
| CsPbBr <sub>3-x</sub> Cl <sub>x</sub> -0            | 0        | 2.0 mL | 2.0 mL |
| CsPbBr <sub>3-x</sub> Cl <sub>x</sub> -4N 0.06 mmol | 0.0216 g | 2.0 mL | 2.0 mL |
| CsPbBr <sub>3-x</sub> Cl <sub>x</sub> -4N 0.12 mmol | 0.0432 g | 2.0 mL | 2.0 mL |
| CsPbBr <sub>3-x</sub> Cl <sub>x</sub> -4N 0.18 mmol | 0.0648 g | 2.0 mL | 2.0 mL |

#### Characterization.

Solid XRD patterns were recorded using an X-ray diffractometer with SmartLab system. TEM images were obtained from the JEOL-2100F electron microscope. FT-IR tests were performed on a Nicolet 6700 FTIR spectrometer with KBr disks. The contents of halogens were obtained from EDS of HITACHI SU8010 scanning electron microscope. Absorption spectra were obtained by Cary7000 UV-Vis-NIR Spectrophotometer with a calibrated integrating sphere. Solid PL spectra, three-dimensional PL spectra, PLQYs and lifetimes were collected by a FLS1000 spectrophotometer ( $\lambda_{\text{ex}} = 360$  nm). The density functional theory calculations were performed on 2N and 4N to obtain the overall charge number in the -NH<sub>3</sub><sup>+</sup>.

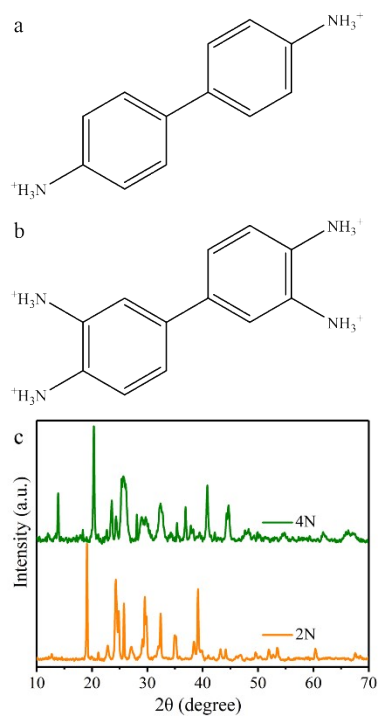

Figure S1 The structure of organic cations: 2N (a) and 4N (b). (c) XRD patterns of 2N and 4N.

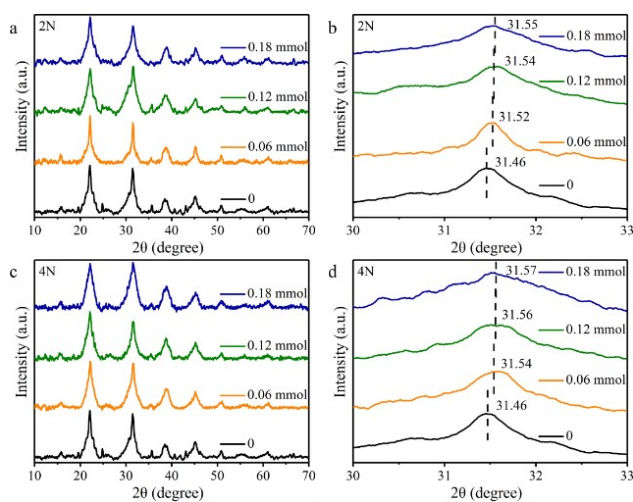

Figure S2 Full and enlarged (from 30 to 33 degree) XRD patterns of  $\text{CsPbBrCl}_2$  before and after the modification with 2N (a, b) and 4N (c, d).

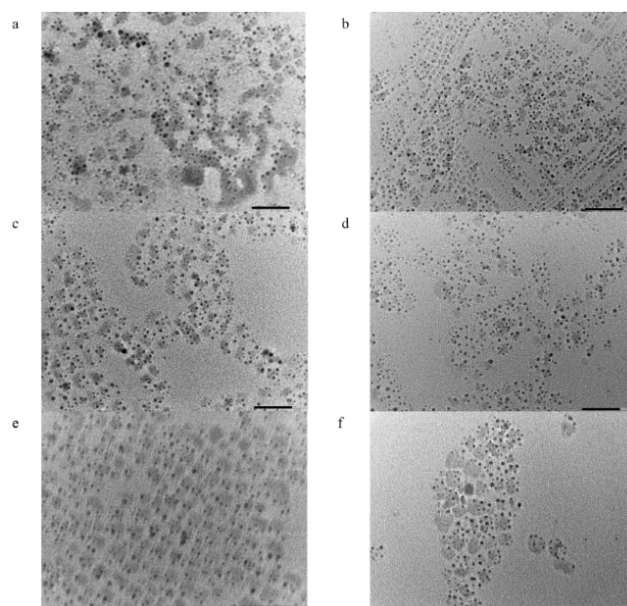

Figure S3 TEM images of CsPbBrCl<sub>2</sub> (a 0, c 0.06 mmol 2N, e 0.06 mmol 4N) and CsPbBr<sub>2</sub>Cl (b 0, d 0.06 mmol 2N, f 0.06 mmol 4N) before and after the modification with 2N and 4N (scale bar is 50 nm).

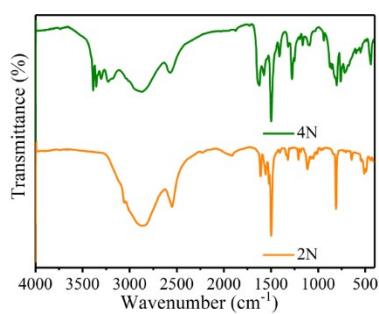

Figure S4 FT-IR spectra of 2N and 4N.

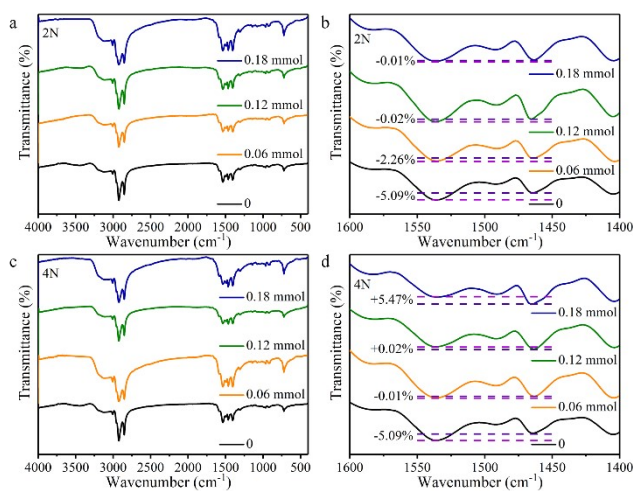

Figure S5 Full and enlarged (from 1400 to 1600 cm<sup>-1</sup>) FT-IR spectra of CsPbBrCl<sub>2</sub> before and after

the modification with 2N (a, b) and 4N (c, d).

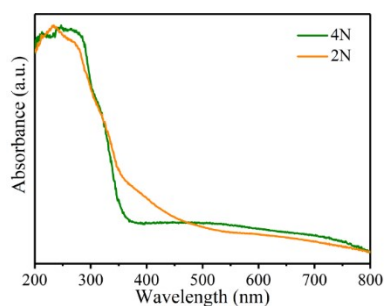

Figure S6 Absorption spectra of 2N and 4N.

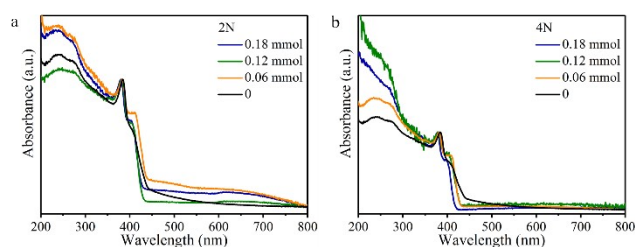

Figure S7 Absorption spectra of CsPbBrCl<sub>2</sub> before and after the modification with 2N (a) and 4N (b).

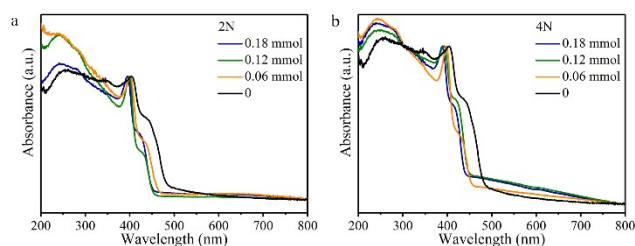

Figure S8 Absorption spectra of CsPbBr<sub>2</sub>Cl before and after the modification with 2N (a) and 4N (b).

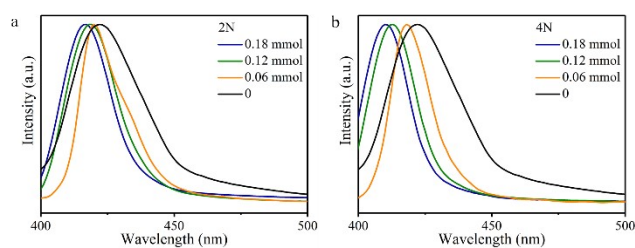

Figure S9 PL spectra ( $\lambda_{\text{ex}} = 360 \text{ nm}$ ) of CsPbBrCl<sub>2</sub> before and after the modification with 2N (a) and 4N (b).

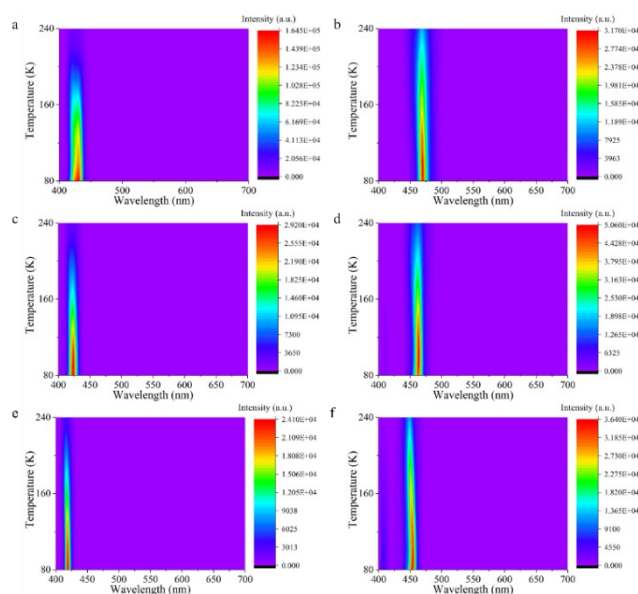

Figure S10 Three-dimensional PL spectra ( $\lambda_{\text{ex}} = 360$  nm) of the emission wavelength-temperature-emission intensity of CsPbBrCl<sub>2</sub> (a 0, c 0.06 mmol 2N, e 0.06 mmol 4N) and CsPbBr<sub>2</sub>Cl (b 0, d 0.06 mmol 2N, f 0.06 mmol 4N) before and after the modification with 2N (c, d) and 4N (e, f).

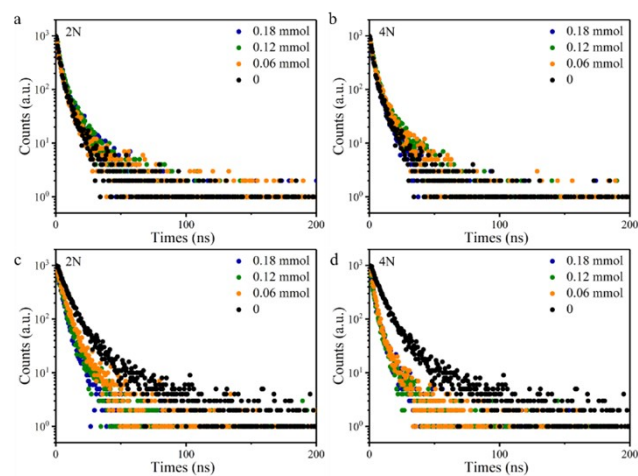

Figure S11 (a, b) PL decay curves ( $\lambda_{\text{ex}} = 360$  nm) of CsPbBrCl<sub>2</sub> before and after the modification with 2N (a) and 4N (b). (c, d) Fluorescence decay curves ( $\lambda_{\text{ex}} = 360$  nm) of CsPbBrCl<sub>2</sub> before and after the modification with 2N (c) and 4N (d).

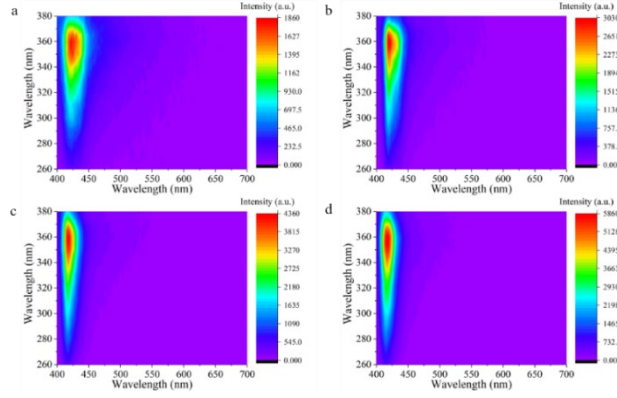

Figure S12 Three-dimensional PL spectra ( $\lambda_{\text{ex}} = 360 \text{ nm}$ ) of emission wavelength-excitation wavelength-emission intensity of CsPbBrCl<sub>2</sub> before (a) and after the modification with 2N: 0.06 mmol (b), 0.12 mmol (c) and 0.18mmol (d).

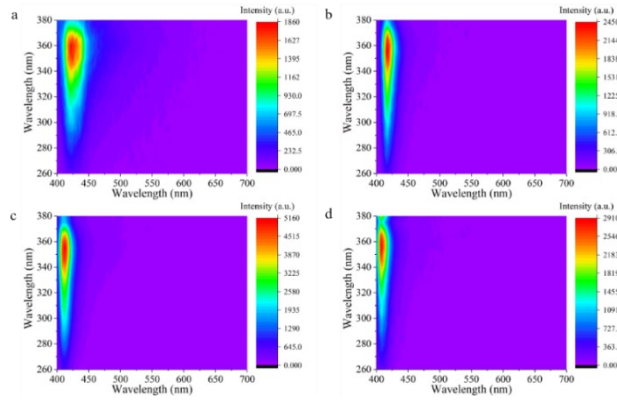

Figure S13 Three-dimensional PL spectra ( $\lambda_{\text{ex}} = 360 \text{ nm}$ ) of emission wavelength-excitation wavelength-emission intensity of CsPbBrCl<sub>2</sub> before (a) and after the modification with 4N: 0.06 mmol (b), 0.12 mmol (c) and 0.18mmol (d).

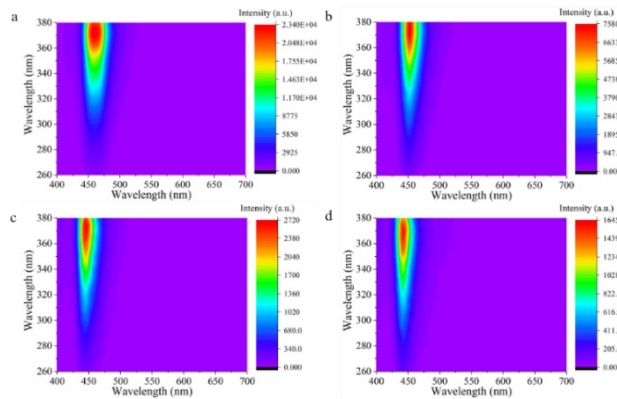

Figure S14 Three-dimensional PL spectra ( $\lambda_{\text{ex}} = 360 \text{ nm}$ ) of emission wavelength-excitation wavelength-emission intensity of CsPbBr<sub>2</sub>Cl before (a) and after the modification with 2N: 0.06 mmol (b), 0.12 mmol (c) and 0.18mmol (d).

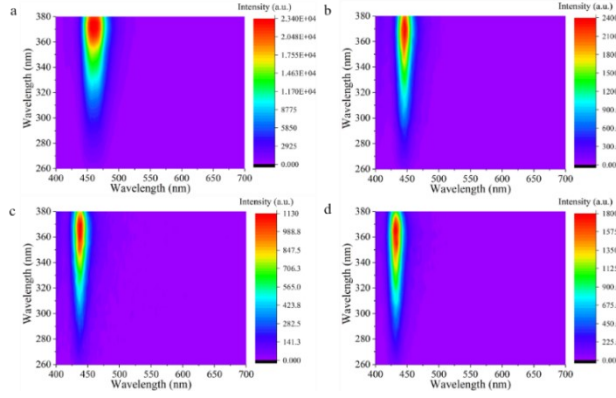

Figure S15 Three-dimensional PL spectra ( $\lambda_{\text{ex}} = 360 \text{ nm}$ ) of emission wavelength-excitation wavelength-emission intensity of CsPbBr<sub>2</sub>Cl before (a) and after the modification with 4N: 0.06 mmol (b), 0.12 mmol (c) and 0.18mmol (d).

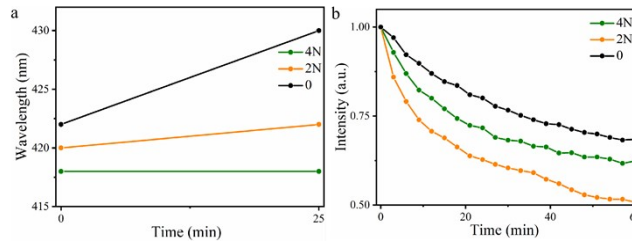

Figure S16 (a) The change on the emission wavelength under stronger illumination of CsPbBrCl<sub>2</sub> before and after modification with 2N and 4N ( $\lambda_{\text{ex}} = 360 \text{ nm}$ ). (b) The change on the emission intensity under weaker illumination of CsPbBrCl<sub>2</sub> before and after modification with 2N and 4N ( $\lambda_{\text{ex}} = 360 \text{ nm}$ ).

Table S4 Elemental composition of CsPbBrCl<sub>2</sub> before and after the modification with 2N.

|           | Cs | Pb   | Br   | Cl   | (Br+Cl)/Pb | Cl/(Cl+Br) |
|-----------|----|------|------|------|------------|------------|
| 0         | 1  | 0.81 | 1.05 | 2.36 | 4.20       | 0.69       |
| 0.06 mmol | 1  | 0.84 | 1.01 | 2.52 | 4.20       | 0.71       |
| 0.12 mmol | 1  | 0.85 | 1.00 | 2.64 | 4.27       | 0.72       |
| 0.24 mmol | 1  | 0.85 | 0.91 | 2.69 | 4.23       | 0.75       |

Table S5 Elemental composition of CsPbBrCl<sub>2</sub> before and after the modification with 4N.

|           | Cs | Pb   | Br   | Cl   | (Br+Cl)/Pb | Cl/(Cl+Br) |
|-----------|----|------|------|------|------------|------------|
| 0         | 1  | 0.81 | 1.05 | 2.36 | 4.20       | 0.69       |
| 0.06 mmol | 1  | 0.87 | 0.89 | 2.77 | 4.21       | 0.76       |
| 0.12 mmol | 1  | 0.89 | 0.84 | 2.91 | 4.21       | 0.78       |
| 0.24 mmol | 1  | 0.95 | 0.78 | 3.31 | 4.31       | 0.81       |



Table S6 Elemental composition of CsPbBr<sub>2</sub>Cl before and after the modification with 2N.

|           | Cs | Pb   | Br   | Cl   | (Br+Cl)/Pb | Cl/(Cl+Br) |
|-----------|----|------|------|------|------------|------------|
| 0         | 1  | 0.88 | 1.97 | 1.22 | 3.65       | 0.38       |
| 0.06 mmol | 1  | 0.83 | 1.79 | 1.48 | 3.95       | 0.45       |
| 0.12 mmol | 1  | 0.86 | 1.75 | 1.69 | 4.00       | 0.49       |
| 0.24 mmol | 1  | 0.85 | 1.61 | 1.86 | 4.05       | 0.54       |

Table S7 Elemental composition of CsPbBr<sub>2</sub>Cl before and after the modification with 4N.

|           | Cs | Pb   | Br   | Cl   | (Br+Cl)/Pb | Cl/(Cl+Br) |
|-----------|----|------|------|------|------------|------------|
| 0         | 1  | 0.88 | 1.97 | 1.22 | 3.65       | 0.38       |
| 0.06 mmol | 1  | 0.84 | 1.74 | 1.70 | 4.08       | 0.49       |
| 0.12 mmol | 1  | 0.84 | 1.67 | 1.93 | 4.29       | 0.54       |
| 0.24 mmol | 1  | 0.93 | 1.66 | 2.38 | 4.36       | 0.59       |

Table S8 Maximum absorption wavelength of CsPbBr<sub>3-x</sub>Cl<sub>x</sub>.

|                           | 0      | 0.06 mmol | 0.12 mmol | 0.24 mmol |
|---------------------------|--------|-----------|-----------|-----------|
| CsPbBrCl <sub>2</sub> -2N | 384 nm | 383 nm    | 382 nm    | 380 nm    |
| CsPbBrCl <sub>2</sub> -4N | 384 nm | 381 nm    | 379 nm    | 378 nm    |
| CsPbBr <sub>2</sub> Cl-2N | 404 nm | 402 nm    | 399 nm    | 395 nm    |
| CsPbBr <sub>2</sub> Cl-4N | 404 nm | 398 nm    | 392 nm    | 389 nm    |

Table S9 Maximum PL emission wavelength of CsPbBr<sub>3-x</sub>Cl<sub>x</sub>.

|                           | 0      | 0.06 mmol | 0.12 mmol | 0.24 mmol |
|---------------------------|--------|-----------|-----------|-----------|
| CsPbBrCl <sub>2</sub> -2N | 422 nm | 420 nm    | 419 nm    | 417 nm    |
| CsPbBrCl <sub>2</sub> -4N | 422 nm | 418 nm    | 413 nm    | 410 nm    |
| CsPbBr <sub>2</sub> Cl-2N | 460 nm | 454 nm    | 448 nm    | 444 nm    |
| CsPbBr <sub>2</sub> Cl-4N | 460 nm | 448 nm    | 438 nm    | 434 nm    |

Table S10 Photophysical properties of CsPbBrCl<sub>2</sub> before and after the modification with 2N.

|               | 0     | 0.06 mmol | 0.12 mmol | 0.24 mmol |
|---------------|-------|-----------|-----------|-----------|
| $\tau_1$ (ns) | 2.21  | 2.11      | 2.26      | 2.54      |
| $a_1$ (%)     | 64.87 | 59.58     | 50.91     | 57.16     |
| $\tau_2$ (ns) | 10.19 | 8.83      | 8.89      | 10.19     |
| $a_2$ (%)     | 35.13 | 40.42     | 49.09     | 42.84     |

|                                           |        |        |        |        |
|-------------------------------------------|--------|--------|--------|--------|
| $\tau_{\text{avg}}$ (ns)                  | 5.01   | 4.82   | 5.52   | 5.82   |
| PLQY (%)                                  | 0.60   | 1.89   | 1.71   | 1.64   |
| $k_{\text{r}}$ ( $10^6 \text{ s}^{-1}$ )  | 1.20   | 3.92   | 3.10   | 2.82   |
| $k_{\text{nr}}$ ( $10^6 \text{ s}^{-1}$ ) | 198.24 | 203.34 | 178.16 | 169.03 |

Table S11 Photophysical properties of CsPbBrCl<sub>2</sub> before and after the modification with 4N.

|                                           | 0      | 0.06 mmol | 0.12 mmol | 0.24 mmol |
|-------------------------------------------|--------|-----------|-----------|-----------|
| $\tau_1$ (ns)                             | 2.21   | 2.41      | 2.72      | 2.35      |
| $a_1$ (%)                                 | 64.87  | 53.88     | 59.47     | 58.65     |
| $\tau_2$ (ns)                             | 10.19  | 10.29     | 10.85     | 7.71      |
| $a_2$ (%)                                 | 35.13  | 46.12     | 40.53     | 41.35     |
| $\tau_{\text{avg}}$ (ns)                  | 5.01   | 6.05      | 6.01      | 4.57      |
| PLQY (%)                                  | 0.60   | 4.12      | 1.11      | 0.64      |
| $k_{\text{r}}$ ( $10^6 \text{ s}^{-1}$ )  | 1.20   | 6.81      | 1.85      | 1.40      |
| $k_{\text{nr}}$ ( $10^6 \text{ s}^{-1}$ ) | 198.24 | 158.59    | 164.51    | 217.53    |

Table S12 Photophysical properties of CsPbBr<sub>2</sub>Cl before and after the modification with 2N.

|                                           | 0     | 0.06 mmol | 0.12 mmol | 0.24 mmol |
|-------------------------------------------|-------|-----------|-----------|-----------|
| $\tau_1$ (ns)                             | 6.17  | 3.95      | 3.37      | 2.76      |
| $a_1$ (%)                                 | 70.65 | 59.99     | 68.08     | 57.63     |
| $\tau_2$ (ns)                             | 20.21 | 10.18     | 9.08      | 6.70      |
| $a_2$ (%)                                 | 29.35 | 40.01     | 31.92     | 51.37     |
| $\tau_{\text{avg}}$ (ns)                  | 10.29 | 6.44      | 5.19      | 5.03      |
| PLQY (%)                                  | 31.57 | 31.48     | 11.56     | 11.01     |
| $k_{\text{r}}$ ( $10^6 \text{ s}^{-1}$ )  | 30.67 | 48.88     | 22.26     | 21.89     |
| $k_{\text{nr}}$ ( $10^6 \text{ s}^{-1}$ ) | 66.49 | 106.38    | 170.33    | 176.92    |

Table S13 Photophysical properties of CsPbBr<sub>2</sub>Cl before and after the modification with 4N.

|                          | 0     | 0.06 mmol | 0.12 mmol | 0.24 mmol |
|--------------------------|-------|-----------|-----------|-----------|
| $\tau_1$ (ns)            | 6.17  | 2.49      | 1.85      | 1.98      |
| $a_1$ (%)                | 70.65 | 71.38     | 50.40     | 58.52     |
| $\tau_2$ (ns)            | 20.21 | 8.30      | 5.56      | 6.84      |
| $a_2$ (%)                | 29.35 | 28.62     | 49.60     | 41.48     |
| $\tau_{\text{avg}}$ (ns) | 10.29 | 4.15      | 3.69      | 3.99      |
| PLQY (%)                 | 31.57 | 7.39      | 5.07      | 3.53      |

|                                    |       |        |        |        |
|------------------------------------|-------|--------|--------|--------|
| $k_r$ ( $10^6 \text{ s}^{-1}$ )    | 30.67 | 17.79  | 13.74  | 8.84   |
| $k_{nr}$ ( $10^6 \text{ s}^{-1}$ ) | 66.49 | 222.91 | 257.33 | 241.58 |

Table S14 Stability on emission wavelength of CsPbBrCl<sub>2</sub> under ultraviolet light exposure.

|           | CsPbBrCl <sub>2</sub> -2N |        | CsPbBrCl <sub>2</sub> -4N |        |
|-----------|---------------------------|--------|---------------------------|--------|
|           | 0                         | 25 min | 0                         | 25 min |
| 0         | 422 nm                    | 430 nm | 422 nm                    | 430 nm |
| 0.06 mmol | 420 nm                    | 422 nm | 418 nm                    | 418 nm |
| 0.12 mmol | 419 nm                    | 419 nm | 413 nm                    | 413 nm |
| 0.24 mmol | 417 nm                    | 417 nm | 410 nm                    | 410 nm |

Table S15 Stability on emission wavelength of CsPbBr<sub>2</sub>Cl under ultraviolet light exposure.

|           | CsPbBr <sub>2</sub> Cl-2N |        | CsPbBr <sub>2</sub> Cl-4N |        |
|-----------|---------------------------|--------|---------------------------|--------|
|           | 0                         | 25 min | 0                         | 25 min |
| 0         | 460 nm                    | 464 nm | 460 nm                    | 464 nm |
| 0.06 mmol | 454 nm                    | 455 nm | 448 nm                    | 448 nm |
| 0.12 mmol | 448 nm                    | 448 nm | 438 nm                    | 438 nm |
| 0.24 mmol | 444 nm                    | 444 nm | 434 nm                    | 434 nm |
